# Supplementary material for: Habitual Intakes, Food Sources and Excretions of Phosphorus and Calcium in Three German Study Collectives
Source: Nutrients. 2018 Feb 2;10(2):171. doi: 10.3390/nu10020171 (PMC5852747; doi:10.3390/nu10020171)
Supplement: Supplementary file 1 [file nutrients-10-00171-s001.pdf]

**Supplementary Materials:**

**Table S1** Product group food item description and examples according to the “National Consumption Study II” [16].

| <b>Product group</b>                     | <b>Description and example food items</b>                                                                                                                                           |
|------------------------------------------|-------------------------------------------------------------------------------------------------------------------------------------------------------------------------------------|
| Bread/cereal products (baked goods)      |                                                                                                                                                                                     |
| Bread                                    | whole meal bread, multigrain bread, brown bread, white bread, crispbread, <u>whole meal roll</u> , multigrain roll, white roll, rye roll, pretzel roll, cornbread, rice bread, rusk |
| Dishes based on bread                    | proven rolls, club sandwich with tuna, toast “Hawaii”, serviette dumpling                                                                                                           |
| Baked goods                              | cakes and tortes, baked goods spicy (pizza, onion cake) and sweet                                                                                                                   |
| Cereals/cereal products                  | cereals and flours, rice (processed), muesli (dry), pasta products, bulgur                                                                                                          |
| Dishes based on cereals/cereal products  | pasta dishes, rice dishes, patties                                                                                                                                                  |
| <b>Vegetables, mushrooms and legumes</b> |                                                                                                                                                                                     |
| Vegetables                               | raw vegetables (green salad, tomato), cooked vegetables (broccoli, carrot)                                                                                                          |
| Vegetable products                       | gherkin, sour preserves, olives, corn preserve                                                                                                                                      |
| Mushrooms                                | steamed chanterelle, steamed mushroom                                                                                                                                               |
| Legumes                                  | roasted soybean, kidney bean preserve                                                                                                                                               |
| Dishes based on vegetables               | salad (cooked vegetables and raw vegetables)                                                                                                                                        |
| <b>Potatoes and potato products</b>      |                                                                                                                                                                                     |
| Potatoes/potato products                 | cooked potatoes with salt, mashed potatoes, potato pancakes, potato dumplings                                                                                                       |
| Other tubers                             | sweet potato, topinambur                                                                                                                                                            |
| Dishes based on potatoes                 | potato salad, potato gratin                                                                                                                                                         |
| <b>Fruit and fruit products</b>          |                                                                                                                                                                                     |
| Fruits                                   | unprocessed fruits                                                                                                                                                                  |
| Fruit products                           | sugared and heated fruits                                                                                                                                                           |
| Dried fruits                             | dried apple, dried peach                                                                                                                                                            |
| <b>Nuts and seeds</b>                    | cashew nuts, peanuts                                                                                                                                                                |
| <b>Fats</b>                              |                                                                                                                                                                                     |
| Animal fats                              | herb butter, cultured butter, butter with yoghurt                                                                                                                                   |

|                                          |                                                                                                                                                                               |
|------------------------------------------|-------------------------------------------------------------------------------------------------------------------------------------------------------------------------------|
| Vegetable fats                           | half-fat margarine, margarine with olive oil                                                                                                                                  |
| Milk, milk products and cheese           |                                                                                                                                                                               |
| Milk and milk beverages                  | cow's milk 3.5% fat, cocoa, milkshake                                                                                                                                         |
| Milk products                            | kefir, buttermilk, sour milk, whey, yoghurt, yoghurt with flavor-giving ingredients (milk and yoghurt: full-fat, reduced-fat, no information) cream, sour cream, coffee cream |
| Cheese and curd                          | hard cheese, soft cheese, cream cheese and curd or junket (some cheeses: full-fat, reduced-fat, no information) sour cream-, cooked-, whey- and processed cheese              |
| Dishes based on milk/milk products       | rice pudding, cornflakes (prepared), cheese dishes                                                                                                                            |
| <b>Eggs</b>                              |                                                                                                                                                                               |
| Eggs                                     | scrambled egg, fried egg, boiled egg                                                                                                                                          |
| Dishes based on eggs                     | pancakes, egg salad, egg in mustard sauce                                                                                                                                     |
| Meat, meat products and sausage products |                                                                                                                                                                               |
| Meat                                     | beef, veal, pork, poultry, meat from other animals, minced meat, innards                                                                                                      |
| Meat and sausage products                | sausage, smoked pork, salami, krakauer, smoked meat, ham                                                                                                                      |
| Dishes based on meat                     | meatball, pork schnitzel, goulash                                                                                                                                             |
| Fish, fish products and crustaceans      |                                                                                                                                                                               |
| Fish and fish products                   | baked filet, smoked trout                                                                                                                                                     |
| Crust and shellfish                      | crab preserve, grilled king prawns, mussels fresh cooked                                                                                                                      |
| Dishes based on fish/crustaceans         | fish fingers, mussels in white wine sauce                                                                                                                                     |
| <b>Soup and stew</b>                     | noodle soup with chicken, potato soup with sausage                                                                                                                            |
| Sauce and flavor-giving ingredients      |                                                                                                                                                                               |
| Sauces                                   | warm sauces, cold sauces (also fruit sauces and ketchup)                                                                                                                      |
| Flavor-giving ingredients                | mustard, vinegar                                                                                                                                                              |
| <b>Sweets</b>                            |                                                                                                                                                                               |
| Sweets                                   | chocolate, other products from chocolate, sweets and candies, muesli bars, fruit bars                                                                                         |
| Ice cream                                | ice cream, soft ice cream                                                                                                                                                     |
| Sweet spreads                            | fruit spread, jam, honey, syrup, chocolate spread, nut spread                                                                                                                 |
| Sweeteners                               | sugar, sugar substitute, sweetener                                                                                                                                            |

|                                         |                                                                                                                     |
|-----------------------------------------|---------------------------------------------------------------------------------------------------------------------|
| <b>Snacks</b>                           |                                                                                                                     |
| Snacks based on potatoes                | chips                                                                                                               |
| Nuts and mixed nuts<br>(roasted/salted) | roasted peanuts, roasted almonds sweet and salted, roasted and salted sunflower seeds                               |
| Peanut flips/popcorn                    | puffed rice, popcorn                                                                                                |
| Salty biscuits                          | tortilla chips, pretzel sticks                                                                                      |
| <b>Beverages</b>                        |                                                                                                                     |
| Water                                   | mineral water, drinking water                                                                                       |
| Coffee and tea                          | cappuccino, coffee, green tea, black tea                                                                            |
| Fruit tea and herb tea                  | peppermint tea, mate tea, rooibos tea                                                                               |
| Fruit juice or nectar                   | apple fizz, orange fizz, multivitamin juice                                                                         |
| Soft drinks                             | orangeade, cola                                                                                                     |
| Fruit drinks                            | ACE fruit juice, wellness drink                                                                                     |
| Other non-alcoholic                     | malt beer, sparkling wine alcohol-free                                                                              |
| Beer                                    | dark beer, pilsner                                                                                                  |
| Wine and sparkling wine                 | red wine, white wine, mulled wine                                                                                   |
| Liquor                                  | whiskey, egg liqueur, grappa                                                                                        |
| Other alcoholic                         | punch, fizz                                                                                                         |
| <b>Other</b>                            | soya drinks, tofu, meat and sausage substitute from soya, cereal spreads, vegetarian lard, vanilla cream, nut cream |

**Table S2** Baseline phosphorus and calcium parameters of women and men from three studies.

|                                      | <b>Study 1</b>                        |                                       | <b>Study 2</b>                        |                                       | <b>Study 3</b>                        |                                        |
|--------------------------------------|---------------------------------------|---------------------------------------|---------------------------------------|---------------------------------------|---------------------------------------|----------------------------------------|
|                                      | Women<br>(n = 15)                     | Men<br>(n = 16)                       | Women<br>(n = 32)                     | Men<br>(n = 24)                       | Women<br>(n = 30)                     | Men<br>(n = 32)                        |
| <b>Phosphorus</b>                    |                                       |                                       |                                       |                                       |                                       |                                        |
| Intake [mg/d] <sup>1</sup>           | 1177 (316)                            | 1539 (362)                            | 1194 (318)                            | 1457 (539)                            | 1187 <sup>+</sup> (268)               | 1530 (294)                             |
| Intake [mg/kg BW]                    | 19 (5)                                | 21 (6)                                | 18 (6)                                | 19 (7)                                | 19 (5)                                | 20 (4)                                 |
| Estimated intake <sup>2</sup> [mg/d] | 1013 (320)                            | 1654 (449)                            | 1057 (306)                            | 1397 (489)                            | 1017 <sup>+</sup> (299)               | 1614 (438)                             |
| Serum/plasma phosphate [mmol/l]      | <sup>S</sup> 1.38 (0.14) <sup>a</sup> | <sup>S</sup> 1.35 (0.18) <sup>a</sup> | <sup>P</sup> 1.06 (0.12) <sup>b</sup> | <sup>P</sup> 1.10 (0.21) <sup>b</sup> | <sup>P</sup> 1.20 (0.17) <sup>c</sup> | <sup>P</sup> 1.22 (0.19) <sup>ab</sup> |
| Urine [mg/d]                         | 658 (208)                             | 1075 (292)                            | 687 (202)                             | 908 (318)                             | 661 (194)                             | 1049(285)                              |
| Faeces [mg/d]                        | 665 (252)                             | 736 (359)                             | 529 (241)                             | 533 (280)                             | -                                     | -                                      |
| <b>Calcium</b>                       |                                       |                                       |                                       |                                       |                                       |                                        |
| Intake [mg/d]                        | 1147 (372)                            | 1153 (430)                            | 840 (252)                             | 896 (398)                             | 819 (239)                             | 977 (321)                              |
| Intake [mg/kg BW]                    | 19 (5) <sup>a</sup>                   | 15 (6)                                | 13 (4) <sup>b</sup>                   | 12 (6)                                | 13 (4) <sup>b</sup>                   | 13 (4)                                 |
| Serum/plasma<br>[mmol/l]             | <sup>S</sup> 2.59 (0.23) <sup>a</sup> | <sup>S</sup> 2.44 (0.07) <sup>a</sup> | <sup>P</sup> 2.35 (0.09) <sup>b</sup> | <sup>P</sup> 2.38 (0.08) <sup>b</sup> | <sup>P</sup> 2.31 (0.05) <sup>b</sup> | <sup>P</sup> 2.37 (0.07) <sup>b</sup>  |
| Urine [mg/d]                         | 114 (51)                              | 222 (81) <sup>a</sup>                 | 133 (64)                              | 150 (80) <sup>b</sup>                 | 125 (49)                              | 155 (68) <sup>b</sup>                  |
| Faeces [mg/d]                        | 883 (270)                             | 1027 (510) <sup>a</sup>               | 749 (360)                             | 687 (324) <sup>b</sup>                | -                                     | -                                      |

Data are expressed as mean (standard deviation); BW body weight; <sup>a, b</sup> mean values within a line within a gender with dissimilar superscript letters are significantly different; results without superscript letters are not significantly different; differences between the studies were tested with univariate analysis of variance followed by Bonferroni post hoc test; + similar symbols indicate significance ( $p = 0.004$ ), tested with Student's t test; <sup>S</sup> concentration in serum; <sup>P</sup> concentration in plasma; <sup>1</sup> phosphorus intake calculated from weighed dietary record; <sup>2</sup> phosphorus intake estimated from renal phosphorus excretion according to Morimoto et al. (2014) [17].
